# Supplementary material
Source: PubMed Central journal article supplement (PMC3352993)
Supplement: NIHMS367685-supplement-01.pdf [file NIHMS367685-supplement-01.pdf]

1 **Table S1.** Correlation coefficients between static histomorphometry measures and mechanical properties are shown  
 2 in the lower triangle and the 95% confidence interval of the correlation is shown in the upper triangle.

|                 | Young's Modulus | Yield Strain  | Residual Strain | Yield Stress  | BV/TV          | BS/TV          | ES/BS         | Tb.Th          | Tb.Sp          | SMI            | DA            | Conn.D        |
|-----------------|-----------------|---------------|-----------------|---------------|----------------|----------------|---------------|----------------|----------------|----------------|---------------|---------------|
| Young's Modulus | -               | (-0.51, 0.78) | (-0.87, 0.27)   | (0.66, 0.98)  | (0.25, 0.95)   | (0.39, 0.96)   | (-0.60, 0.72) | (-0.59, 0.73)  | (-0.94, -0.16) | (-0.92, 0.02)  | (-0.83, 0.40) | (-0.53, 0.77) |
| Yield Strain    | 0.23            | -             | (-0.59, 0.73)   | (-0.15, 0.90) | (-0.43, 0.82)  | (-0.56, 0.74)  | (-0.85, 0.34) | (-0.45, 0.80)  | (-0.80, 0.46)  | (-0.65, 0.68)  | (-0.84, 0.38) | (-0.88, 0.22) |
| Residual Strain | -0.48           | 0.13          | -               | (-0.59, 0.73) | (-0.94, -0.13) | (-0.94, -0.10) | (-0.92, 0.03) | (-0.93, -0.07) | (-0.34, 0.85)  | (0.08, 0.93)   | (-0.78, 0.50) | (-0.82, 0.42) |
| Yield Stress    | 0.92*           | 0.57          | 0.13            | -             | (0.36, 0.96)   | (0.26, 0.95)   | (-0.68, 0.66) | (-0.46, 0.80)  | (-0.93, -0.06) | (-0.92, 0.06)  | (-0.83, 0.37) | (-0.66, 0.67) |
| BV/TV           | 0.79*           | 0.33          | -0.73*          | 0.83*         | -              | (0.51, 0.97)   | (-0.40, 0.83) | (-0.14, 0.90)  | (-0.90, 0.14)  | (-0.96, -0.28) | (-0.82, 0.41) | (-0.54, 0.76) |
| BS/TV           | 0.84*           | 0.16          | -0.72*          | 0.79*         | 0.88*          | -              | (-0.29, 0.86) | (-0.43, 0.81)  | (-0.96, -0.29) | (-0.96, -0.33) | (-0.74, 0.57) | (-0.32, 0.85) |
| ES/BS           | 0.11            | -0.42         | -0.65           | -0.01         | 0.36           | 0.47           | -             | (-0.55, 0.75)  | (-0.69, 0.63)  | (-0.91, 0.08)  | (-0.49, 0.79) | (-0.45, 0.81) |
| Tb.Th           | 0.12            | 0.30          | -0.70*          | 0.29          | 0.58           | 0.32           | 0.18          | -              | (-0.75, 0.56)  | (-0.79, 0.48)  | (-0.58, 0.73) | (-0.73, 0.58) |
| Tb.Sp           | -0.74*          | -0.29         | 0.42            | -0.70*        | -0.58          | -0.80*         | -0.05         | -0.17          | -              | (-0.43, 0.81)  | (-0.53, 0.77) | (-0.80, 0.46) |
| SMI             | -0.67*          | 0.02          | 0.71*           | -0.63         | -0.80*         | -0.82*         | -0.62         | -0.27          | 0.33           | -              | (-0.67, 0.66) | (-0.86, 0.31) |
| DA              | -0.36           | -0.38         | -0.25           | -0.39         | -0.35          | -0.15          | 0.26          | 0.13           | 0.21           | -0.01          | -             | (-0.56, 0.75) |
| Conn.D          | -0.21           | -0.52         | -0.34           | 0.01          | 0.19           | 0.44           | 0.31          | -0.13          | -0.30          | -0.44          | 0.17          | -             |

\* p < 0.05. Full correlation scatterplots are included in Fig. S1.

3  
4  
5  
6
